# Supplementary material
Source: HighWire-hosted journal article supplement (http://www.jneurosci.org/highwire/filestream/598447/field_highwire_adjunct_files/0/Legends_for_supplemental_material.pdf)
Supplement: Legends_for_supplemental_material.pdf [file Legends_for_supplemental_material.pdf]

## Legends for supplemental material

### Supplementary Figure 1

Inward currents elicited by NMDA exposure in cultured mouse cortical neurons were inhibited by NMDA receptor agonists, 100  $\mu$ M MK801 (A) and 50  $\mu$ M APV (B). Alternating pulses or step pulses were applied from the holding potential of -40 mV, as done in Fig. 4A, before, but not during, stimulation with NMDA.

### Supplementary Figure 2

Representative PI staining of slices taken 1 h after incubation in control or NMDA-containing ACSF with or without IAA-94 (1 mM). Pictures were taken at low (upper panels) and high (bottom panels) magnifications. Scale bars: 500  $\mu$ m and 100  $\mu$ m in upper and lower panels, respectively.
